# Supplementary material for: Characterizing water solubility of fresh and aged secondary organic aerosol in PM 2.5 with the stable carbon isotope technique
Source: Copernicus journal article supplement (doi:10.5194/egusphere-2024-736), 2024-03-22
Supplement: Supplementary file 1 [file egusphere-2024-736-supplement.pdf]

1 *Supplementary of*

2 **Characterizing water solubility of fresh and aged secondary organic**  
3 **aerosol in PM<sub>2.5</sub> with the stable carbon isotope technique**

4

5 Fenghua Wei<sup>1</sup>, Xing Peng<sup>1</sup>, Liming Cao<sup>1</sup>, Mengxue Tang<sup>1</sup>, Ning Feng<sup>1</sup>, Xiaofeng Huang<sup>1</sup>, Lingyan  
6 He<sup>1</sup>

7 <sup>1</sup>Laboratory of Atmospheric Observation Supersite, School of Environment and Energy, Peking  
8 University Shenzhen Graduate School, Shenzhen 518055, China.

9 **Correspondence:** Xing Peng (pengxing@pku.edu.cn)

10 **Contents of this file**

11 **Text S1 - Text S2**

12 Text S1. PMF model and results

13 Text S2. Sampling of potential emission sources of carbonaceous aerosol

14 **Figure S1 - Figure S5**

15 Figure S1. Seasonal backward trajectory of air masses in Shenzhen, 2019. (a) spring (b) summer (c) fall  
16 (d) winter.

17 Figure S2. The source profiles resolved by PMF for PM<sub>2.5</sub>.

18 Figure S3. Source apportionment results of PM<sub>2.5</sub> (a) and carbonaceous aerosol (b) based on the PMF  
19 model. (c) The relative contribution of different sources to PM<sub>2.5</sub> and carbonaceous fractions.

20 Figure S4. The source profiles resolved by PMF for WSOC.

21 Figure S5. Cumulative frequency distributions of the proportional contributions from potential sources  
22 of TC (a) and WSOC (b) based on BSIM model.

23 **Table S1 - Table S3**

24 Table S1. Description of the sampling sites in Shenzhen.

25 Table S2. General meteorological conditions during the sampling period in 2019.

26 Table S3. Comparison of  $\delta^{13}\text{C}_{\text{TC}}$  source signatures in this study with global datasets

27 **Text S1: PMF model and results**

28 In this study, the PMF model (EPA PMF v5.0,) was employed to identify the sources of TC and WSOM.  
29 The detailed fundamental principle of this model can be found in Paatero et al.(1994) (Paatero and Tapper  
30 1994). The mass concentration and uncertainty values of seventeen indicative chemical components (OM,  
31 EC,  $\text{NH}_4^+$ ,  $\text{Cl}^-$ ,  $\text{NO}_3^-$ ,  $\text{SO}_4^{2-}$ , Na, Mg, Al, K, Ca, V, Ni, Cd, Fe, Zn, and Pb) were put into this model to  
32 calculate the contributions of different sources to TC. The information on the measurement of the  
33 carbonaceous fractions is described in the main text. In addition, an Ion Chromatography Analyser (ICS-  
34 2500, Dionex; Sunnyvale, California, USA) and Inductively Coupled Plasma Mass Spectrometry (ICP-  
35 MS, Aurora M90; Bruker, Germany) were used for the mass concentration analysis of water-soluble ions  
36 and metal elements respectively. Ten factors (vehicle emissions, ship emissions, aged sea salt,  
37 construction dust, fugitive dust, coal combustion, industrial emissions, biomass burning, secondary  
38 sulfate, and secondary nitrate) were identified, as shown in Fig. S2. SOA was then estimated from the  
39 OM fraction in both secondary sulfate and secondary nitrate factors. To compare with BSIM results, the  
40 source apportionment of TC was merged into three sources, including SOA, traffic emission, and biomass  
41 burning (Fig. S3) (Zong et al., 2018). The industrial emission source and coal combustion source were  
42 not included because of their little contribution to carbonaceous fraction. The remaining eight sources  
43 were then reapportioned and then combined according to the contribution to OC and EC. Specifically,  
44 the contributions of vehicle and ship emissions to EC and OC were attributed to the traffic source. The  
45 contributions of secondary sulfate, secondary nitrate, and aged sea salt sources to OC were all attributed  
46 to the SOA. The contributions of biomass burning source to OC were attributed to the BB (biomass  
47 burning) source. The mass concentration and uncertainty values of five species ( $\text{CO}_2^+$ ,  $\text{C}_4\text{H}_9^+$ ,  $\text{C}_2\text{H}_4\text{O}_2^+$ ,  
48 WSOC, and WSOO) were put into the PMF model to calculate the contribution of three sources (BBOA

49 (biomass burning organic aerosol), LO-OOA (less-oxidized oxygenated OA), MO-OOA (more-oxidized  
50 oxygenated OA)) to WSOM (Fig. S4).

## 51 **Text S2: Sampling of potential emission sources of carbonaceous aerosol**

52 PM<sub>2.5</sub> samples of four sources were collected from ambient air and simulation experiments to measure  
53 the  $\delta^{13}\text{C}$  values of TC and WSOC in this study. We collected PM<sub>2.5</sub> samples from two tunnel sites (Mount  
54 Tanglang tunnel and Jiuweiling tunnel), which can comprehensively reflect the vehicle emissions level  
55 to ambient air in Shenzhen because of its specificity of the environment. Two medium-flow samplers  
56 (KC-120H model, Qingdao Laoshan, 100 L/min) were used in this sampling process. The lengths of  
57 those two tunnels were 1711 m and 1447 m, representing the emission characteristics of diesel and petrol  
58 vehicles in Shenzhen respectively. General information about the number of samples and sampling time  
59 at each tunnel are provided in Table S4 and S5. Specifically, six samples were obtained from 23:00 to  
60 02:10 and 02:30 to 05:30 on 13-18 October 2014 at the Mount Tanglang tunnel site. Additional eight  
61 samples were subsequently collected at different periods (peak and off-peak traffic periods in both  
62 daytime and night) on 20-22 January 2015 at the junction of one side of Mount Tanglang tunnel, and the  
63 sampling durations ranged from 2.5 to 11.5 hours. A total of 11 samples were obtained at the Jiuweiling  
64 tunnel site. The peak and off-peak traffic periods in both daytime and night were also included in this  
65 sampling period, and the sampling durations ranged from 2 to 6 hours. For fresh SOA, five PM<sub>2.5</sub>  
66 samples from petrol vehicle bench tests conducted under different fuel types and operating conditions  
67 were collected. Detailed information about this test system was displayed in Zheng et al. (2017) (Zheng  
68 2017). Two parallel samples were collected and measured under each operating condition to ensure the  
69 reliability of the measured data. Two aged SOA samples were collected at the national ambient air  
70 background monitoring station in Mount Wuzhi, Hainan Province, from 13-15 April 2015. A complete

71 secondary transport process was captured during this sampling period, and each sampling duration was  
 72 23.5 hours. Lastly, We collected three PM<sub>2.5</sub> samples representing the biomass combustion source  
 73 through biomass combustion simulation experiment (He et al., 2010), of which were conducted in the  
 74 combustion simulation laboratory at Peking University Shenzhen Graduate School on 24-28 May 2017.  
 75 Pine branches, as a major source of biomass burning in south China (Chen et al., 2017) were selected as  
 76 the representative plant for the combustion simulation experiment in this study. The pine branches were  
 77 divided into three weight groups (low (3 kg), medium (6 kg) and high (8 kg)). Samples at three different  
 78 combustion stages (ignition, flame combustion, and complete combustion) were collected, and the  
 79 sampling time at each stage was 49, 75, and 90 minutes, respectively. Each sampling and analysis process  
 80 was repeated three times to ensure reliability.

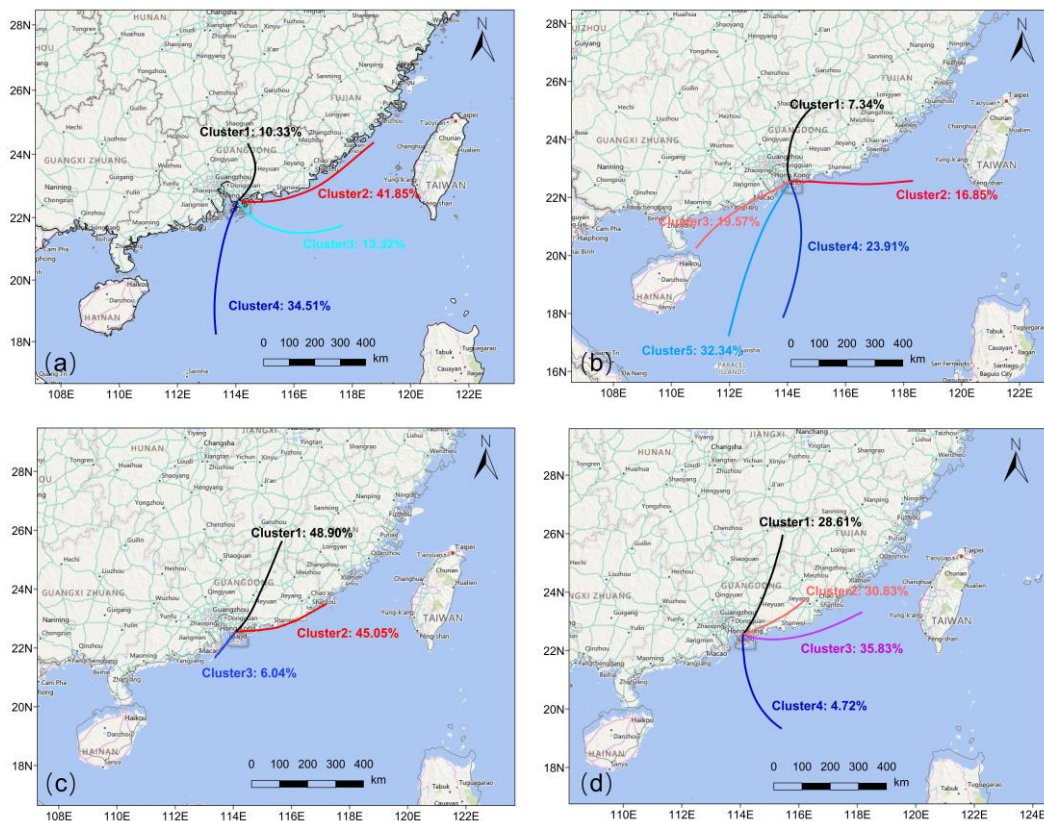

81  
 82 **Figure S1.** Seasonal backward trajectory of air masses in Shenzhen, 2019. (a) spring (b) summer (c) fall  
 83 (d) winter. Map image: © Microsoft by MeteoInfoMap.

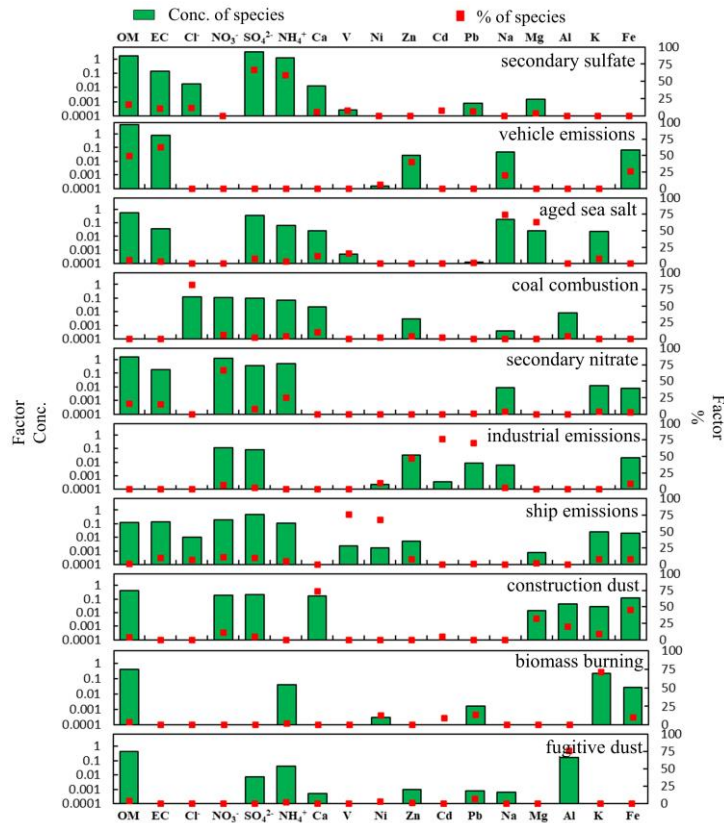

84

85

**Figure S2.** The source profiles resolved by PMF for PM<sub>2.5</sub>.

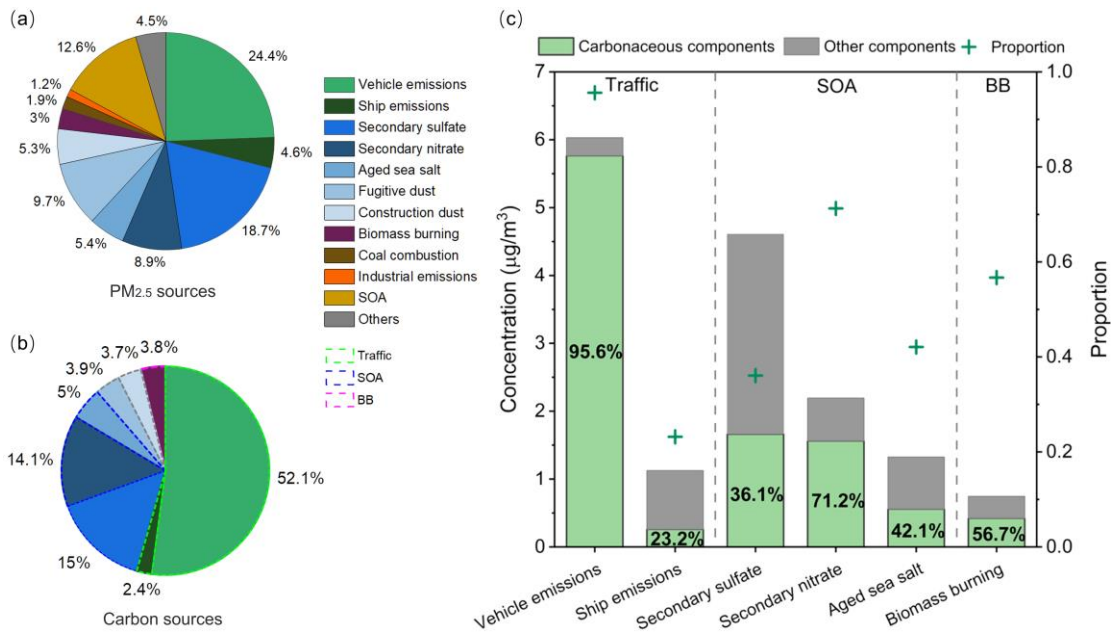

86

**Figure S3.** Source apportionment results of PM<sub>2.5</sub> (a) and carbonaceous aerosol (b) based on the PMF

88 model. (c) The relative contribution of different sources to PM<sub>2.5</sub> and carbonaceous fractions.

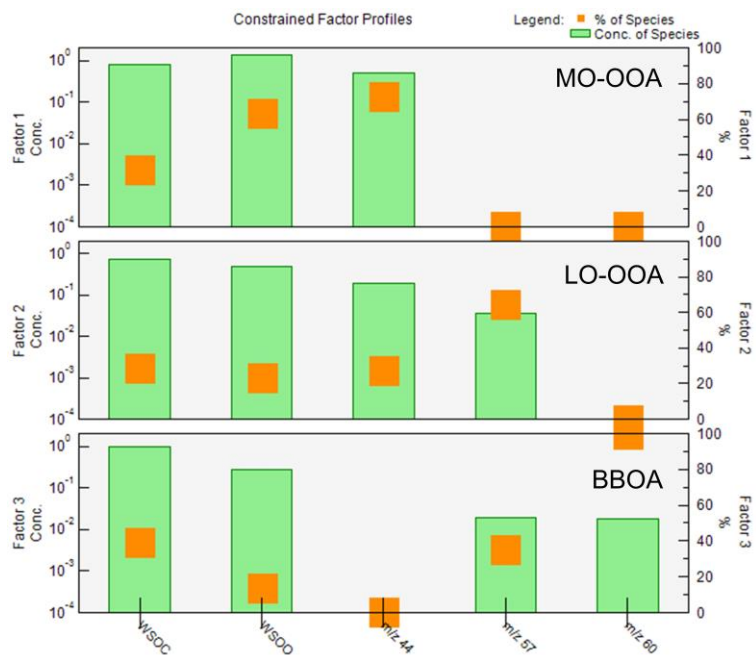

89

90

**Figure S4.** The source profiles resolved by PMF for WSOC.

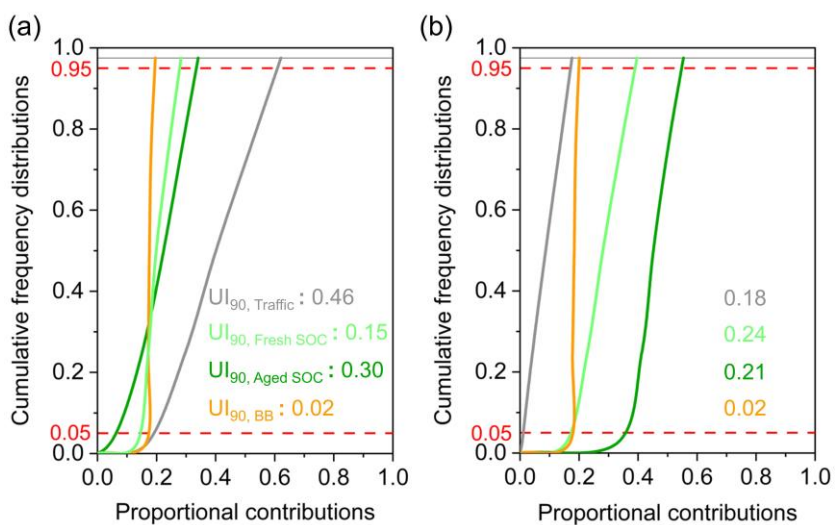

91

92 **Figure S5.** Cumulative frequency distributions of the proportional contributions from potential sources

93 of TC (a) and WSOC (b) based on BSIM model.

94 **Table S1.** Description of the sampling sites in Shenzhen.

| Site            | Site Code | Coordinates                    | Site description                                                                                        |
|-----------------|-----------|--------------------------------|---------------------------------------------------------------------------------------------------------|
| University town | UT        | Lat: 22.59°N<br>Long: 113.97°E | Urban<br>This site reflects the pollution characteristics of typical urban areas and regional transport |
| Longhua         | LH        | Lat: 22.68°N<br>Long: 114.01°E | Urban<br>This site generally reflects the pollution characteristics of urban local emissions            |
| Honghu          | HH        | Lat: 22.57°N<br>Long: 114.14°E | Urban<br>This site reflects the pollution characteristics of the general urban areas                    |
| Xixiang         | XX        | Lat: 22.58°N<br>Long: 113.90°E | Urban<br>This site reflects the pollution characteristics of western industrial urban areas in Shenzhen |
| Dapeng          | DP        | Lat: 22.64°N<br>Long: 114.42°E | Background<br>This site reflects the pollution characteristics of the eastern coastal tourist areas     |

95

96 **Table S2.** General meteorological conditions during the sampling period in 2019.

|                        | Mean temp. (°C) | Rainfall (mm) | Mean RH (%) | Mean wind speed (m s <sup>-1</sup> ) | Predominant wind direction |
|------------------------|-----------------|---------------|-------------|--------------------------------------|----------------------------|
| Spring (1 Mar-8 Apr)   | 21.3            | 151.8         | 83.0        | 1.7                                  | ESE                        |
| Summer (1 Jun-3 Jul)   | 28.5            | 275.8         | 85.0        | 2.2                                  | SW                         |
| Autumn (1 Sept-11 Oct) | 27.6            | 175.0         | 74.0        | 1.6                                  | ESE                        |
| Winter (22 Nov-30 Dec) | 19.5            | 3.2           | 62.0        | 2.0                                  | NNE                        |

97



98 **Table S3.** Comparison of  $\delta^{13}\text{C}_{\text{TC}}$  source signatures in this study with global datasets.

| <b>Emission sources</b> | <b>Continent</b>        | <b>Location</b>        | <b>Sample types</b>                | <b><math>\delta^{13}\text{C}(\text{‰})</math></b> | <b>SD</b>   | <b>Ref.</b>                      |
|-------------------------|-------------------------|------------------------|------------------------------------|---------------------------------------------------|-------------|----------------------------------|
|                         | <b>Asia(This study)</b> | <b>China, Shenzhen</b> | <b>Traffic</b>                     | <b>-26.26</b>                                     | <b>0.50</b> | <b>-</b>                         |
|                         | Asia                    | China                  | Wucun Tunnel, Entrance             | -25.84                                            | 0.23        |                                  |
|                         | Asia                    | China                  | Wucun Tunnel, Exit                 | -25.88                                            | 0.24        | (Yao et al., 2022)               |
|                         | Asia                    | China                  | Xianyueshan Tunnel, Entrance       | -25.88                                            | 0.26        |                                  |
|                         | Asia                    | China                  | Xianyueshan Tunnel, Exit           | -25.79                                            | 0.23        |                                  |
|                         | Asia                    | Guangzhou              | Traffic                            | -24.6 to -25.5                                    |             | (Dai et al., 2015)               |
|                         | Asia                    | India                  | Traffic                            | -25.3                                             | 0.3         | (Agnihotri et al., 2011)         |
|                         | Asia                    | Nepal                  | Traffic                            | -26.5 to -26.1                                    |             | (Shakya;Ziemba and Griffin 2010) |
|                         | Asia                    | China                  | Traffic                            | -25.85                                            | 0.22        | (Yao et al., 2022)               |
|                         | Asia                    | China                  | Traffic                            | -25.27                                            | 0.32        | (Chen et al., 2012)              |
| <b>Traffic</b>          | Asia                    | Pearl River Delta      | Gasoline exhaust                   | -28.6                                             | 0.6         |                                  |
|                         | Asia                    | Pearl River Delta      | Diesel exhaust                     | -27.8                                             | 0.2         |                                  |
|                         | Asia                    | China                  | Zhujiang Tunnel, Vehicle emissions | -25                                               | 0.3         | (Dai et al.,2013)                |
|                         | Asia                    | India                  | Diesel exhaust                     | -26.3                                             | 0.2         |                                  |
|                         | Asia                    | India                  | Bio-diesel exhaust                 | -26.5                                             | 0.1         | (Singh et al., 2018)             |
|                         | Asia                    | India                  | Petrol(Gasoline) exhaust           | -26.1                                             | 0.01        |                                  |
|                         | North America           | Mexico                 | Tunnel; Diesel vehicle emissions   | -24.6                                             | 0.3         |                                  |
|                         | North America           | Mexico                 | Tunnel; Gasoline vehicle emissions | -25.5                                             | 0.1         | (López-Veneroni 2009)            |
|                         | Oceania                 | New Zealand            | Mount Victoria Tunnel              | -25.9                                             | 0.8         | (Ancelet et al., 2011)           |
|                         | Europe                  | Germany                | Gasoline exhaust                   | -26.2                                             | 0.2         | (Fisseha et al., 2009)           |
|                         | Europe                  | Paris                  | Diesel exhaust                     | -26.5                                             | 0.5         | (Widory et al., 2004)            |
|                         | Europe                  | Germany                | Diesel exhaust                     | -27.6                                             | 0.01        | (Fisseha et al., 2009)           |
|                         | Europe                  | Paris                  | Complete combustion of diesel      | -29                                               |             | (Widory 2006)                    |

|            |                        |                        |                                                      |                |             |                        |
|------------|------------------------|------------------------|------------------------------------------------------|----------------|-------------|------------------------|
|            | Europe                 | Paris                  | Complete combustion of gasoline                      | -27            |             | (Widory 2006)          |
|            | Europe                 | Paris                  | Fuel oil exhaust                                     | -26.5          | 0.5         | (Widory et al., 2004)  |
|            | Europe                 | Krakow, Poland         | Traffic                                              | -30            | 1           | (Zimnoch et al., 2020) |
|            | worldwide              | worldwide              | Traffic group1                                       | -26.8          | 1.1         |                        |
|            | worldwide              | worldwide              | Traffic group2                                       | -28.9          | 1.7         | (Yao et al., 2022)     |
|            | worldwide              | worldwide              | Traffic group3                                       | 30.2           | 0.9         |                        |
|            | <b>Asia(Our study)</b> | <b>China, Hainan</b>   | <b>Aged SOC , ambient samples of the Mount Wuzhi</b> | <b>-25.54</b>  | <b>0.28</b> | -                      |
|            | <b>Asia(Our study)</b> | <b>China, Shenzhen</b> | <b>Fresh SOC , petrol vehicle bench tests</b>        | <b>-27.31</b>  | <b>0.73</b> |                        |
| <b>SOA</b> | Europe                 | Germany                | Compounds in SOA: aerosol-phase nopinone             | -27.6 to -24.8 |             |                        |
|            | Europe                 | Germany                | Compounds in SOA: acetone                            | -35.1 to -38.6 |             |                        |
|            | Europe                 | Germany                | Compounds in SOA: gas-phase nopinone                 | -28.8          |             | (Fisseha et al., 2009) |
|            | Europe                 | Germany                | Precursor of SOA: initial $\beta$ -pinene injected   | -30.1          |             |                        |
|            | Europe                 | Germany                | Precursors of SOA                                    | -29.6          | 0.2         |                        |
|            | North America          | Canada                 | Secondary particulate organic matter                 |                |             | (Irei et al., 2011)    |
|            | North America          | Canada,                | Secondary particulate organic matter                 | -32.2 to -32.9 |             | (Irei et al., 2006)    |
|            | <b>Asia(Our study)</b> | <b>China, Shenzhen</b> | <b>Burning experiment results of pine branches</b>   | <b>-27.58</b>  | <b>0.24</b> | -                      |
|            | worldwide              | worldwide              | C3 plant                                             | -27.2          | 1.6         |                        |
|            | Asia                   | China                  | C3 plant                                             | -27.89         | 0.26        | (Yao et al., 2022)     |
|            | Asia                   | China                  | Seven C3 plants                                      | -27.12         |             |                        |
|            | Asia                   | China                  | Biomass burning (Seven C3 plants)                    | -26.99         | 1.11        |                        |
| <b>BB</b>  | America                | Texas                  | C3 plant                                             | -27            | 6           | (Boutton 1991)         |
|            | Europe                 | Krakow, Poland         | Biomass burning(C3 plants)                           | -26            | 2           | (Zimnoch et al., 2020) |
|            | Asia                   | China                  | C4 smoldering                                        | -14.25         |             |                        |
|            | Asia                   | China                  | C4 flaming                                           | -18.42         |             |                        |
|            | Asia                   | China                  | C4 plant (corn stalk)                                | -12            |             | (Yao et al., 2022)     |
|            | Asia                   | China                  | Biomass burning (corn stalk)                         | -13.09         |             |                        |
|            | worldwide              | worldwide              | C4 plant                                             | -13.2          | 1.1         |                        |
|            | America                | Texas                  | C4 plant                                             | -13            | 4           | (Boutton 1991)         |

100 **References**

- 101 Agnihotri, R., Mandal, T. K., Karapurkar, S. G., Naja, M., Gadi, R., Ahammed, Y. N., Kumar, A., Saud,  
102 T. & Saxena, M. (2011) Stable carbon and nitrogen isotopic composition of bulk aerosols over India  
103 and northern Indian Ocean. *Atmos. Environ.*, 45, 2828-2835.
- 104 Ancelet, T., Davy, P. K., Trompetter, W. J., Markwitz, A. & Weatherburn, D. C. (2011) Carbonaceous  
105 aerosols in an urban tunnel. *Atmos. Environ.*, 45, 4463-4469.
- 106 Boutton, T. W. 1991. 11 – Stable carbon isotope ratios of natural materials: II. atmospheric, terrestrial,  
107 marine, and freshwater environments.
- 108 Chen, Y., Wenger, J. C., Yang, F. M., Cao, J. J., Huang, R. J., Shi, G. M., Zhang, S. M., Tian, M. & Wang,  
109 H. B. (2017) Source characterization of urban particles from meat smoking activities in Chongqing,  
110 China using single particle aerosol mass spectrometry. *Environ. Pollut.*, 228, 92-101.
- 111 Chen, Y. J., Cai, W. W., Huang, G. P., Li, J. & Zhang, G. (2012) Stable carbon isotope of black carbon  
112 from typical emission sources in China. *Environ. Sci.*, 33, 673-8.
- 113 Dai, S., Bi, X., Chan, L. Y., He, J., Wang, B., Wang, X., Peng, P., Sheng, G. & Fu, J. (2015) Chemical  
114 and stable carbon isotopic composition of PM<sub>2.5</sub> from on-road vehicle emissions in the PRD region  
115 and implications for vehicle emission control policy. *Atmos. Chem. Phys.*, 15, 3097-3108.
- 116 Fisseha, R., Spahn, H., Wegener, R., Hohaus, T., Brasse, G., Wissel, H., Tillmann, R., Wahner, A.,  
117 Koppmann, R. & Kiendler-Scharr, A. (2009) Stable carbon isotope composition of secondary organic  
118 aerosol from  $\beta$ -pinene oxidation. *J. Geophys. Res. Atmos.*, 114.
- 119 He, L. Y., Lin, Y., Huang, X. F., Guo, S., Xue, L., Su, Q., Hu, M., Luan, S. J. & Zhang, Y. H. (2010)  
120 Characterization of high-resolution aerosol mass spectra of primary organic aerosol emissions from  
121 Chinese cooking and biomass burning. *Atmos. Chem. Phys.*, 10, 11535-11543.
- 122 Irei, S., Huang, L., Collin, F., Zhang, W., Hastie, D. & Rudolph, J. (2006) Flow reactor studies of the  
123 stable carbon isotope composition of secondary particulate organic matter generated by OH-radical-  
124 induced reactions of toluene. *Atmos. Environ.*, 40, 5858-5867.
- 125 Irei, S., Rudolph, J., Huang, L., Auld, J. & Hastie, D. (2011) Stable carbon isotope ratio of secondary  
126 particulate organic matter formed by photooxidation of toluene in indoor smog chamber. *Atmos.*  
127 *Environ.*, 45, 856-862.
- 128 López-Veneroni, D. (2009) The stable carbon isotope composition of PM<sub>2.5</sub> and PM<sub>10</sub> in Mexico City

129 Metropolitan Area air. *Atmos. Environ.*, 43, 4491-4502.

130 Paatero, P. & Tapper, U. (1994) Positive matrix factorization: a nonnegative factor model with optimal  
131 utilization of error estimates of data values. *Environmetrics.*, 5, 111-126.

132 Shakya, K. M., Ziemba, L. D. & Griffin, R. J. (2010) Characteristics and Sources of Carbonaceous, Ionic,  
133 and Isotopic Species of Wintertime Atmospheric Aerosols in Kathmandu Valley, Nepal. *Aerosol Air*  
134 *Qual Res.*, 10, 219-U13.

135 Singh, G. K., Rajput, P., Paul, D. & Gupt, T. (2018) Wintertime study on bulk composition and stable  
136 carbon isotope analysis of ambient aerosols from North India. *J Aerosol Sci.*, 126, 231-241.

137 Widory, D. (2006) Combustibles, fuels and their combustion products: A view through carbon isotopes.  
138 *Combust. Theory Model.*, 10, 831-841.

139 Widory, D., Roy, S., Le Moullec, Y., Goupil, G., Cocherie, A. & Guerrot, C. (2004) The origin of  
140 atmospheric particles in Paris: a view through carbon and lead isotopes. *Atmos. Environ.*, 38, 953-  
141 961.

142 Yao, P., Huang, R. J., Ni, H. Y., Kairys, N., Yang, L., Meijer, H. A. J. & Dusek, U. (2022) <sup>13</sup>C signatures  
143 of aerosol organic and elemental carbon from major combustion sources in China compared to  
144 worldwide estimates. *Sci. Total Environ.*, 810.

145 Zheng, J. 2017. Source apportionment of organic aerosols and contribution of secondary formation from  
146 vehicle emissions. Peking university.

147 Zimnoch, M., Samek, L., Furman, L., Styszko, K., Skiba, A., Gorczyca, Z., Galkowski, M., Rozanski, K.  
148 & Konduracka, E. (2020) Application of natural carbon isotopes for emission source apportionment  
149 of carbonaceous particulate matter in urban atmosphere: a case study from Krakow, southern Poland.  
150 *Sustainability.*, 12.

151 Zong, Z., Tan, Y., Wang, X., Tian, C., Fang, Y., Chen, Y., Fang, Y., Han, G., Li, J. & Zhang, G. (2018)  
152 Assessment and quantification of NO<sub>x</sub> sources at a regional background site in North China:  
153 Comparative results from a Bayesian isotopic mixing model and a positive matrix factorization model.  
154 *Environ. Pollut.*, 242, 1379-1386.

155
