# Supplementary material for: Characterizing water solubility of fresh and aged secondary organic aerosol in PM 2.5 with the stable carbon isotope technique
Source: Copernicus journal article supplement (doi:10.5194/egusphere-2024-736), 2024-03-22
Supplement: Supplementary file [file egusphere-2024-736-AC2-supplement.pdf]

1 We are very grateful for the anonymous reviewer’s positive assessments of the manuscript and  
2 insightful comments for further improvement. We have revised the manuscript by fully taking the  
3 reviewers’ suggestions into account. Please find our point-to-point replies below in blue, and the  
4 specific changes in the revised manuscript and SI are highlighted here in red.

5 **Reviewer 2**

6 The manuscript analyzed the water-soluble and water insoluble organic carbon in a coastal megacity  
7 of China. The sources and contributions of WSOC and WIOC to PM<sub>2.5</sub> were explored with Bayesian  
8 stable isotope mixing model, and the water solubility of fresh and aged SOC in the coastal megacity  
9 of China were revealed. The study is important and meaningful, while there are still some questions  
10 need to be clarified to improve the manuscript.

11 **Specific comments:**

12 1. I am confused about how the BSIM and PMF model used in the source apportionment of the  
13 TC and WSOC. The author should re-organize section 2.3 to make it clear.

14 As described in section 2.3, The four sources, including traffic, biomass burning, the fresh SOC and  
15 aged SOC were resolved by PMF model. The author also obtained the stable carbon isotope  
16 fingerprints by traffic emission samples collected in tunnels, fresh SOC simulated through petrol  
17 vehicle bench tests, aged SOC samples collected at a background monitoring station and biomass  
18 burning samples simulated through laboratory experiment.

19 Did the fingerprint above were used as prior information in the BSIM model? What about the  $\delta^{13}\text{C}/\text{‰}$   
20 values of the four sources? How could the author verify the representation of the four source  
21 fingerprints and that they can be properly used in Shenzhen?

22 **Response:**

23 We sincerely appreciate your suggestion. The PMF model referred to in section 2.3 of the  
24 manuscript serves to determine the potential source of TC and WSOC for further refined source  
25 apportionment using the BSIM model. We have already re-organized section 2.3 to make it much  
26 clear. At lines 142-147 in the revised manuscript, we have provided a more detailed description of  
27 the role of the PMF model in this study:

28 ‘In this study, we firstly employed the PMF model to identify the potential sources of TC and  
29 WSOC (Text S1), with the aim of reducing the uncertainty of the subsequent BSIM model and  
30 verifying the reliability of the BSIM results. The PMF results showed that traffic emissions, SOA,  
31 and biomass burning are the major contributors to carbonaceous aerosols in Shenzhen, which were  
32 similar to the previous results in Guangzhou (Huang et al., 2014).’

33 In this study, stable carbon isotope fingerprints of traffic emissions, fresh and aged SOC, and  
34 biomass burning sources were obtained, along with mass spectral signatures of biomass burning  
35 source ( $f_{60}$ ), and all these fingerprints were used as prior information for the BSIM model.  
36 Additional clarification on this point has been incorporated at lines 159-160 in the revised  
37 manuscript:

38 ‘The measured profiles of the four sources were used as prior information in the BSIM model

39 for the follow-up analyses.'

40 The specific  $\delta^{13}\text{C}/\text{‰}$  values for the four sources were detailed in Table 1. The four source  
41 fingerprints used in this study were all compared with the results from relevant literatures in Table  
42 S3 in the Supplementary Information (SI). The comparison demonstrated that the stable carbon  
43 isotope values of each source measured in this study closely aligned with literature findings and fell  
44 within the range of source spectra reported in other studies, which confirms the reliability of the  
45 four source fingerprints employed in this study. Regarding this point, we have also included further  
46 elucidation at lines 175-177 in the revised manuscript:

47 'The stable carbon isotope measurements from the four sources align with the range observed  
48 in global datasets, thus affirming the reliability of the four source fingerprints utilized in this study.'

49 2. This study firstly employed BSIM model to quantify the contributions of fresh and aged SOC  
50 to WSOC and WIOC. The author claimed the consistence of the results from BSIM and PMF model.  
51 My question about the method used in this study is what is the advantages of the BSIM model  
52 compared with PMF model? Why was the result of BSIM model used for the final analysis?

53 **Response:**

54 Thank you for your comment. The most significant advantage of the BSIM model over the  
55 PMF model in this study is its capability to simultaneously quantify fresh and aged SOC in TC and  
56 WSOC. In the source apportionment of offline  $\text{PM}_{2.5}$  samples based on the PMF model, the absence  
57 of mass spectrometry information makes it impossible to differentiate between fresh and aged SOC  
58 in TC. Consequently, only the overall SOC source can be apportioned. Therefore, PMF model could  
59 not provide further quantification of the water solubility characteristics of SOC. Hence, the BSIM  
60 model results were employed in this study as the final analysis. This point has been clarified in  
61 section 2.3 of the revised manuscript (lines 151-156):

62 'Since the PMF model lacks the mass spectral information of offline  $\text{PM}_{2.5}$  samples, it fails to  
63 distinguish between fresh SOC and aged SOC in TC, making it challenging to investigate the water  
64 solubility characteristics of the SOC based on PMF results. BSIM model simultaneously quantified  
65 of fresh and aged SOC separately in both TC and WSOC, thereby enabling an estimation of SOC  
66 water solubility. This capability is used for the final analysis in this study.'

67 3. Line137-138, the SOC was divided into fresh SOC and aged SOC based on the oxidation state,  
68 what is the exact values of the average oxidation state of carbon (OSc) or O/C of the two SOC  
69 sources?

70 **Response:**

71 Thank you for your comment. The O/C ratios ranged from 0.51 - 0.62 for fresh SOC and the  
72 mean O/C ratio for aged SOC was 0.98 in this study, both of which were close to the O/C ratios  
73 calculated by the PMF model for fresh SOC (0.43) and aged SOC (1.01). We have improved the  
74 accuracy and clarity of the descriptions in lines 164-166 and lines 169-170 of the revised manuscript:

75 lines 164-166: 'The oxygen-carbon ratios (O/C) of fresh SOC samples in this study ranged  
76 from 0.51 to 0.62, indicating a low oxidation state (Ding et al., 2012).'

77 lines 169-170: ‘These aged SOC samples exhibited a high O/C value of 0.98, suggesting their  
78 highly oxidized state (Zhu et al., 2016).’

79 4. Line 162, table 1 showed the  $\delta^{13}\text{C}/\text{‰}$  values of the four sources in TC and WSOC, I noticed  
80 that the value of  $\delta^{13}\text{C}/\text{‰}$  for different OC showed obvious overlap, for example, the values of fresh  
81 SOC in WSOC and TC were lower and higher than that of traffic source, respectively? How did the  
82 sources were determined being clearly separated by the values of  $\delta^{13}\text{C}$  with the existence of the  
83 obvious overlap of the  $\delta^{13}\text{C}/\text{‰}$ ?

84 **Response:**

85 Thank you for your comment. Stable carbon isotope values of atmospheric particulate matter  
86 from different sources may overlap for a number of reasons. For instance, the values of fresh SOC  
87 and traffic emissions are likely to overlap primarily because some fresh SOC could be further  
88 generated by traffic emissions, and different components of the same source may possess similar  
89 stable carbon isotope values. Besides, particulate matter fractions from different sources may  
90 undergo distinct physical and chemical processes in the atmosphere, along with carbon isotope  
91 fractionation, all of which could contribute to changes in stable carbon isotope values.

92 Although the overlap degree of stable carbon isotope values from different sources may affect  
93 the accuracy of the Bayesian approach, it’s essential to note that the Bayesian approach is a  
94 probabilistic model that utilizes both a priori information and a likelihood function to estimate the  
95 contribution of sources. This approach enables probabilistic estimation of contributions from  
96 different sources. In addition, it can also integrate information from multiple markers and sources,  
97 thereby mitigating the effects of overlap and enhancing the robustness of source apportionment  
98 analyses.

99 In this study, the following methods were employed to mitigate the impact of  $\delta^{13}\text{C}$  values’  
100 overlapping between different sources on the BSIM model. First, the number and type of potential  
101 sources of TC and WSOC were identified in advance based on the PMF model, avoiding the  
102 uncertainty of interference from unrelated sources. Secondly, in addition to stable carbon isotopes,  
103 the chemical tracer marker of biomass burning source ( $f_{60}$ ) provided additional information to the  
104 BSIM model, which helped to improve not only the apportionment accuracy of biomass burning  
105 source, but also the overall accuracy of the BSIM model.

106 The following content has been added to section 2.3 in the revised manuscript (lines 179-184):  
107 ‘Although there is some overlap among the  $\delta^{13}\text{C}$  fingerprints of different sources, the Bayesian  
108 approach allows for probabilistic estimation of the contribution of different sources and can also  
109 integrate information from multiple markers and sources to mitigate the effects of overlap. In this  
110 study, the PMF model was used to reduce the uncertainty of interference from unrelated sources,  
111 and the chemical tracer marker of biomass burning source ( $f_{60}$ ) was also integrated to minimize the  
112 effect of this overlap.’

113 5. Line332, the meaning of the dots and lines in Figure 5a should be added.

114 **Response:**

115 Thanks for the suggestion. The meaning of the dots and lines has been added in the caption of  
116 Figure 5a (Now Figure 6a in revised manuscript). The specific additions are as follows:

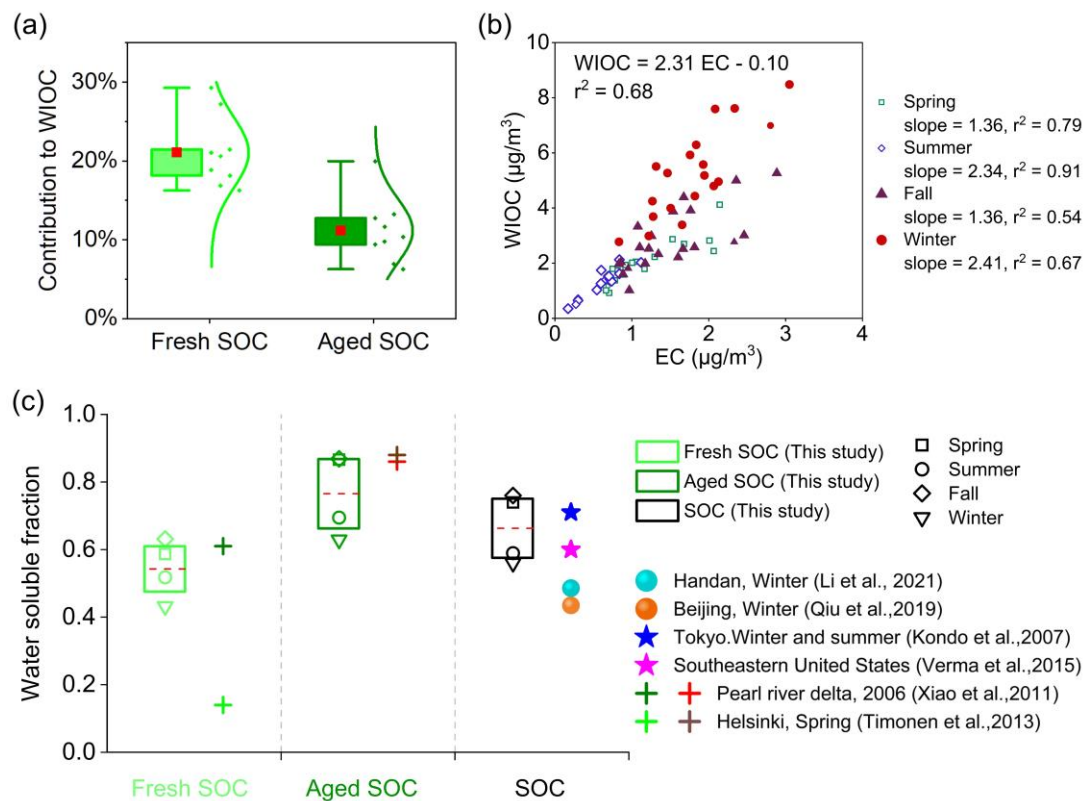

117

118 **Figure 6.** (a) Left is the box and whisker plots of fresh and aged SOC contributions to WIOC, the upper  
 119 and lower of the box representing the 75th and 25th percentiles, and the red squares featuring mean  
 120 values. The dots on the right show the contribution of fresh and aged SOC to WIOC across seasons and  
 121 sites, the curve demonstrates its normal distribution. (b) Scatterplot of WIOC versus EC by season, (c)  
 122 Comparison of the water-soluble fraction of SOC (fresh SOC, aged SOC, SOC) in this study (box and  
 123 whisker plots) with those in other related literature (colored markings on the right). The upper and lower  
 124 of the box represent the 75th and 25th percentiles and the dashed red lines indicate mean values.

125 6. Line 338-339, the reference has been listed in the legend of figure 5, so it doesn't need to be  
 126 listed in the caption here.

127 **Response:**

128 Thanks for the suggestion. The references have been removed from the caption of Figure 5  
 129 (Figure 6 in revised manuscript).

130 7. The subdivided OOAs were name as fresh SOC and aged SOC in the manuscript, while they were  
 131 named MO-OOA and LO-OOA in Figure S4. Please make the names of these items consistency  
 132 through the manuscript or add some statement of the difference.

133 **Response:**

134 Thank you very much for raising this point. Since fresh SOC and aged SOC, as well as LO-  
 135 OOA and MO-OOA, were differentiated by the degree of oxidation of SOC in our study, and the  
 136 O/C ratios of fresh SOC and LO-OOA, as well as aged SOC and MO-OOA, were close to each  
 137 other, we have adjusted the names of the two to be consistent as you suggested. Specifically, we  
 138 have renamed LO-OOA and MO-OOA in Figure S5 and SI as fresh SOC and aged SOC, respectively.

139 'According to Fig. S5, factor 1 displayed the highest percentage of EV values for  $m/z$  44 ( $\text{CO}_2^+$ ) and  
 140 WSOO (73 % and 63 %, respectively), with an oxygen-carbon ratio (O/C) of 1.01, which is highly  
 141 oxidized and identified as aged SOC source. Factor 2 exhibited EV values of 64% for  $m/z$  57  
 142 ( $\text{C}_4\text{H}_9^+$ ), 29% for WSOC, 27% for  $m/z$  44, and 23% for WSOO. In addition, factor 2 had a lower  
 143 level of oxidation with an O/C ratio of 0.43, and was therefore identified as fresh SOC source.'  
 144

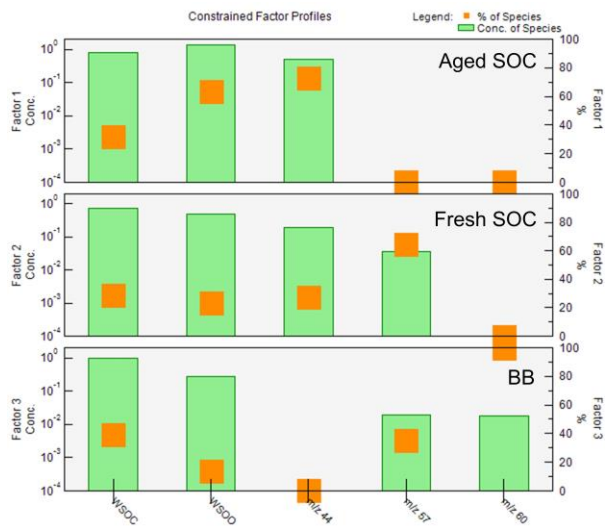

145

146

**Figure S5.** The source profiles resolved by PMF for WSOC.
